# Supplementary material for: Fibres—threads of intelligence—enable a new generation of wearable systems
Source: Royal Society of Chemistry journal article supplement (doi:10.1039/d4cs00286e), 2024-01-01
Supplement: d4cs00286e1.pdf [file d4cs00286e1.pdf]

1

## Electronic Supplementary Information

### 2 **ibres — Threads of Intelligence — Enable A New Generation of Wearable Systems**

3 Dr. Chao Dang <sup>#a,b</sup>, Dr. Zhixun Wang <sup>#b</sup>, Prof. Theodore Hughes-Riley <sup>c</sup>, Shengtai Qian <sup>b</sup>, Dr. Zhe Wang <sup>b</sup>, Xingbei Wang <sup>b</sup>, Mingyang Liu <sup>b</sup>,  
4 Senlong Yu <sup>a</sup>, Rongkun Liu <sup>a</sup>, Dewen Xu <sup>a</sup>, Prof. Tilak Dias <sup>\*c</sup>, Prof. Lei Wei <sup>\*b</sup>, Prof. Wei Yan <sup>\*a</sup>, Prof. Meifang Zhu <sup>\*a</sup>

5 a. State Key Laboratory for Modification of Chemical Fibers and Polymer Materials, College of Materials Science and Engineering, Donghua  
6 University, Shanghai 201620, China.

7 b. School of Electrical and Electronic Engineering, Nanyang Technological University, 639798, Singapore.

8 c. Nottingham School of Art and Design, Nottingham Trent University, Dryden Street, Nottingham NG1 4GG, UK.

9 E-mail: [tilak.dias@ntu.ac.uk](mailto:tilak.dias@ntu.ac.uk); [wei.lei@ntu.edu.sg](mailto:wei.lei@ntu.edu.sg); [weiyang@mit.edu](mailto:weiyang@mit.edu); [zmf@dhu.edu.cn](mailto:zmf@dhu.edu.cn);

10 #These authors contributed equally.

11

12

13

14

16 **Table 1.** Summary of representative functional fibres enabled smart fabrics from acting fibres, active materials, working mechanisms, fabrication  
 17 technologies, and applications

| Acting fibres                              | Active materials                                                   | Working mechanisms | Fabrication technologies                             | Applications                                   | Refs |
|--------------------------------------------|--------------------------------------------------------------------|--------------------|------------------------------------------------------|------------------------------------------------|------|
| Semiconducting nanowire-based fibres       | Se                                                                 | Photoelectricity   | Thermal-drawing combined with sonochemical treatment | Fluorescence imaging system                    | [1]  |
| Small-core single-crystal germanium fibres | Ge                                                                 | Photoelectricity   | Chemical vapor deposition                            | Photodetection at telecommunication wavelength | [2]  |
| Glass-clad semiconductor core fibres       | SeTe                                                               | Photoelectricity   | Reactive molten core approach                        | Optical switch                                 | [3]  |
| Metal-insulator-semiconductor fibres       | As <sub>2</sub> Se <sub>3</sub>                                    | Photoelectricity   | Thermal-drawing                                      | Photodetector array fabric                     | [4]  |
| Polymeric geometric fibres                 | As <sub>40</sub> Se <sub>49</sub> Te <sub>11</sub> Sn <sub>5</sub> | Photoelectricity   | Thermal-drawing                                      | Omnidirectional web photodetector fabrics      | [5]  |
| Non-centrosymmetric fibres                 | P(VDF-TrFE)                                                        | Piezoelectricity   | Thermal-drawing                                      | Acoustic wave detector fabrics                 | [6]  |

|                                |                          |                           |                                            |                                                                       |      |
|--------------------------------|--------------------------|---------------------------|--------------------------------------------|-----------------------------------------------------------------------|------|
| Composite piezoelectric fibres | BTO/P(VDF-TrFE)          | Piezoelectricity          | Thermal-drawing                            | Audible microphone fabrics                                            | [7]  |
| Composite piezoelectric fibres | BaTiO <sub>3</sub> /PVDF | Piezoelectricity          | Electrospinning                            | Distinguish vocal patterns                                            | [8]  |
| Piezoelectric nanofibres       | BaTiO <sub>3</sub> /PVDF | Piezoelectricity          | Coating                                    | Active voice recognition                                              | [9]  |
| Core-sheath conductive fibres  | GO-CNT                   | Piezoresistivity          | Coating and chemical reduction             | Tactile-tension sensory fabrics                                       | [10] |
| Soft and stretchable fibres    | Liquid metal             | Piezoresistivity          | Thermal-drawing                            | Probes of multimodal deformations                                     | [11] |
| Coaxial piezoresistive fibres  | Stainless-steel          | Piezoresistivity          | Coating                                    | AI-powered conformal tactile fabrics                                  | [12] |
| \                              | PEDOT:PSS                | Piezoresistivity          | Chemical vapor deposition                  | Respiratory sensor fabrics                                            | [13] |
| Liquid metal fibres            | Liquid metal             | Piezoresistivity          | Syringe injection                          | Electronic fabrics systems with near-field powering and communication | [14] |
| Low viscosity polymer fibres   | Liquid metal             | Piezoelectricity          | Soluble-core thermal drawing               | self-adapting multi-dimensional sensory fabrics                       | [15] |
| Twisted MWCNT fibres           | MCNTs                    | Electromechanic actuation | Dry spinning and chemical vapor deposition | Artificial muscles                                                    | [16] |

---

|                                             |                                |                            |                                   |                                                   |      |
|---------------------------------------------|--------------------------------|----------------------------|-----------------------------------|---------------------------------------------------|------|
| Cellulose yarns coated with PPy             | PPy                            | Electromechanic actuation  | Metal-free deposition             | Artificial muscles                                | [17] |
| Twisted CNT fibres                          | CNTs                           | Vapor actuation            | Hierarchical and helical assembly | Actuating fabrics                                 | [18] |
| Triacetate-cellulose bimorph fibres         | CNTs                           | Infrared gating actuation  | Coating                           | Thermal management fabrics                        | [19] |
| Coiled monofilament fibres                  | Nylon                          | Thermomechanical actuation | Twist insertion                   | Artificial muscles                                | [20] |
| Conductive weft and luminescent warp fibres | Ionogels, ZnS phosphor, and Ag | Electroluminescence        | Melt-spinning and coating         | Large-area display communication fabrics          | [21] |
| Diode fibres                                | Si                             | Photoelectricity           | Thermal-drawing                   | Optical communication fabrics                     | [22] |
| \                                           | Ag conductor ink, CNTs         | Piezoresistivity           | Stencil printing and coating      | Wireless body area sensor fabrics                 | [23] |
| \                                           | Cu/Ni                          | Piezoresistivity           | Laser-cut                         | Radio surface plasmons mode communication fabrics | [24] |
| \                                           | Cu/Al                          | \                          | Stacking                          | Near-field communication                          | [25] |

---

|                                                  |                                                                                                            |                   |                      |                                              |      |
|--------------------------------------------------|------------------------------------------------------------------------------------------------------------|-------------------|----------------------|----------------------------------------------|------|
| Interlaced cathode and anode fibres              | Ti, ZnO, and PEDOT:PSS                                                                                     | Photoelectricity  | Dip-coating          | fabrics<br>Polymer solar cell fabrics        | [26] |
| Photoanode fibres                                | ZnO, Mn,                                                                                                   | Photoelectricity  | In-suit growth       | Photo-rechargeable fabric                    | [27] |
| Double-twisted perovskite fibres                 | CH <sub>3</sub> NH <sub>3</sub> PbI <sub>3-x</sub> Cl <sub>x</sub> , P3HT, CNTs, TiO <sub>2</sub> , and Ag | Photoelectricity  | Dip-coating          | Wearable fibrous perovskite solar cell       | [28] |
| Polyvinyl chloride/<br>BaTiO <sub>3</sub> fibres | BaTiO <sub>3</sub>                                                                                         | Piezoelectricity  | Wet-spinning         | Piezoelectric nanogenerator fabrics          | [29] |
| Twisted stainless steel/polyester fibres         | Stainless steel, polyester, and PDMS                                                                       | Triboelectricity  | Coating and stacking | Triboelectric nanogenerator fabrics          | [30] |
| Neodymium magnet fibres                          | NdFeB, Cu coils                                                                                            | Electromagnetics  | Blow spinning        | Magneto-electrical generator fabrics         | [31] |
| Continuous p/n thermoelectric fibres             | CNTs, PEI, PVA                                                                                             | Thermoelectricity | Gelation extrusion   | Modularized thermoelectric generator fabrics | [32] |

---

|                                            |                           |                                   |                     |                                           |      |
|--------------------------------------------|---------------------------|-----------------------------------|---------------------|-------------------------------------------|------|
| CNT fibres                                 | CNTs                      | Thermoelectricity                 | Wet-spinning        | Thermoelectric generator fabrics          | [33] |
| Lithium-ion battery fibres                 | Cu, Al, LCO, and graphite | Electrochemistry                  | Dip-coating         | Fibre lithium-ion batterie fabrics        | [34] |
| Lithium-air battery fibres                 | CNTs, LiI                 | Electrochemistry                  | Wrapping            | Lithium-air battery fabrics               | [35] |
| Zinc ion fibres                            | Zn, MnO <sub>2</sub> , GO | Electrochemistry                  | Soaking and coating | Wireless body area network fabrics        | [36] |
| \                                          | Ag, polyethylene          | Nanophotonic heating              | Coating and plating | Radiative heating fabrics                 | [37] |
| \                                          | Ag                        | Joule heating                     | Coating             | Thermal management fabrics                | [38] |
| \                                          | MXene                     | Joule heating and solar heating   | Coating             | Passive and active heating fabrics        | [39] |
| \                                          | ZnO, polyethylene         | Spectrally selective cooling      | Coating             | Radiative cooling fabrics                 | [40] |
| Metafibers                                 | TiO <sub>2</sub> , PLA    | Extended spectra response cooling | Melt-spinning       | Passive daytime radiative cooling fabrics | [41] |
| Thermally conductive fibres                | boron nitride, PVA        | Thermal conduction                | 3D printing         | Thermal regulation fabrics                | [42] |
| light-emitting electrochemical cell fibres | CNTs, ZnO                 | Electrochemistry                  | Wrapping            | Colour-tunable fabrics                    | [43] |

---

|                                           |                                              |                     |                                          |                                                                        |      |
|-------------------------------------------|----------------------------------------------|---------------------|------------------------------------------|------------------------------------------------------------------------|------|
| Transparent conductive fibres             | ZnS, Cu, and Au                              | Electroluminescence | Coating and solution-based metallization | Display patterns changable fabrics                                     | [44] |
| Stretchable and conductive coaxial fibres | MXene                                        | Triboelectricity    | Wet-spinning                             | Strain sensing fabrics for body motion detection                       | [45] |
| \                                         | Ag                                           | Triboelectricity    | Coating                                  | Wireless sensory fabrics for pulse detection                           | [46] |
| \                                         | Bismuth oxide                                | Piezoresistivity    | Coating                                  | Flexible breath sensory fabrics for nephropathy diagnosis              | [47] |
| CNT fibres                                | CNTs, Prussian blue, PEDOT:PSS, PAIN, and Ag | Electrochemistry    | Electrospinning and coating              | Electrochemical fabrics for monitoring health conditions of human body | [48] |
| \                                         | CNTs, Ni                                     | Piezoresistivity    | Stacking                                 | Tactile sensory fabrics for keyboard control                           | [49] |
| Conductive hierarchical hairy fibres      | Ag                                           | Piezoresistivity    | Coating                                  | Multimodal gesture distinguishable fabrics for computer control        | [50] |
| Kelver fibres                             | Ag                                           | Capacitance         | Chemical reduction                       | Pressure sensory                                                       | [51] |

---

|                |                                |                  |                   |                                                                        |      |
|----------------|--------------------------------|------------------|-------------------|------------------------------------------------------------------------|------|
| Digital fibres | Chips                          | \                | Thermally drawing | fabrics for drone quadrotor control machine-learning inference fabrics | [52] |
| Ag fibres      | Ag, P(VDF-TrFE), Au, Pentacene | Piezoelectricity | Dip-coating       | Neural network fabrics for processing electrocardiogram data           | [53] |

---

18  
19  
20  
21  
22  
23  
24  
25  
26  
27



28

29

30 **Table S2.** Comparison of thermoelectric properties of semiconductors-based thermoelectric fibres and fabrics.

| Semiconductors                                                                                                                | Type   | Heat sink | p-n pairs                  | Electronic connection                 | $\Delta T$ (°C) | Area (mm <sup>2</sup> ) | $S^2\sigma$ ( $\mu\text{Wm}^{-1}\text{K}^{-2}$ ) | $\kappa$ ( $\text{Wm}^{-1}\text{K}^{-1}$ ) | ZT    | Output Voltage (mV) | Output Power ( $\mu\text{W}$ ) | Reference |
|-------------------------------------------------------------------------------------------------------------------------------|--------|-----------|----------------------------|---------------------------------------|-----------------|-------------------------|--------------------------------------------------|--------------------------------------------|-------|---------------------|--------------------------------|-----------|
| Ag <sub>2</sub> Te                                                                                                            | n-type | /         | /                          | /                                     | Up to 40        | 100                     | 359.76                                           | /                                          | /     | 0.52                | /                              | [54]      |
| Bi <sub>0.5</sub> Sb <sub>1.5</sub> Te <sub>3</sub> (p type) and Bi <sub>2</sub> Te <sub>2.7</sub> Se <sub>0.3</sub> (n type) | Both   | /         | Constructed uni-couples    | Sintered fibers and metallic contacts | 12              | 0.0314                  | 170-260                                          | /                                          | /     | 4.8                 | 0.018                          | [55]      |
| Si NWs                                                                                                                        | Both   | /         | Arrays connected in series | Metal lines                           | -203.15         | 25                      | 0.047                                            | 9                                          | 0.047 | 27.9                | 0.47                           | [56]      |
| Boron-doped Si nanotube                                                                                                       | p-type | \         | \                          | Metal contacts with Mo pads           | 40-700          | 5000                    | /                                                | 0.015                                      | 0.34  | 22                  | /                              | [57]      |

|                                                                                                                               |        |        |                            |                              |         |     |         |             |          |      |      |      |
|-------------------------------------------------------------------------------------------------------------------------------|--------|--------|----------------------------|------------------------------|---------|-----|---------|-------------|----------|------|------|------|
| Bi <sub>0.5</sub> Sb <sub>1.5</sub> Te <sub>3</sub> (p type) and Bi <sub>2</sub> Se <sub>3</sub> (n type)                     | Both   | Copper | Arrays connected in series | /                            | -213.15 | /   | 3.52    | 0.844       | 1.25     | 97   | /    | [58] |
| Bi <sub>2</sub> Te <sub>2.7</sub> Se <sub>0.3</sub> (n type) and Bi <sub>0.5</sub> Sb <sub>1.5</sub> Te <sub>3</sub> (p type) | Both   | /      | Arrays connected in series | /                            | /       | 100 | 183     | 0.77        | /        | 0.83 | 0.81 | [59] |
| PbTe nanocrystals                                                                                                             | p-type | /      | /                          | Coated on Glass Fibers       | 58      | /   | 150-410 | 0.228-0.226 | 0.2-0.73 | 1.7  | /    | [60] |
| CNT                                                                                                                           | p-type | /      | /                          | AFM probe with local heating | 155     | /   | /       | /           | /        | /    | /    | [61] |
| Sb <sub>2</sub> Te <sub>3</sub> (p-type) and Bi <sub>2</sub> Te <sub>3</sub> (n-type)                                         | Both   | /      | Arrays connected in series | Silver foil                  | 5-35    | /   | /       | /           | /        | 10   | 15   | [62] |
| Bi <sub>2</sub> Te <sub>3</sub> (n-type) and Sb <sub>2</sub> Te <sub>3</sub> (p-type)                                         | Both   | /      | Arrays connected in series | Silver paste                 | 50      | 160 | /       | 1.48        | /        | 90   | /    | [63] |
| SWCNTs/Sb <sub>2</sub> Te <sub>3</sub> hybrid films (p-type)                                                                  | Both   | /      | Arrays connected           | Vacuum filtration            | 70      | /   | 108     | /           | 0.0035   | 135  | 23.6 | [64] |

---

|                                                                  |            |   |           |                                                              |        |   |        |          |                       |     |       |      |  |
|------------------------------------------------------------------|------------|---|-----------|--------------------------------------------------------------|--------|---|--------|----------|-----------------------|-----|-------|------|--|
| and RGO/Bi <sub>2</sub> Te <sub>3</sub><br>hybrid films (n-type) |            |   | in series | and<br>annealing                                             |        |   |        |          |                       |     |       |      |  |
| PEDOT<br>/Cu <sub>2</sub> Se NWs                                 | n-<br>type | / | /         | /                                                            | 30     | / | 270.3  | 0.25-0.3 | 0.3                   | 15  | 320   | [65] |  |
| PVDF/Ta <sub>4</sub> SiTe <sub>4</sub><br>whiskers               | n-<br>type | / | /         | /                                                            | 35.5   | / | 576    | 1.7      | 0.13                  | 60  | 1680  | [66] |  |
| PEDOT<br>/Te NWs                                                 | p-<br>type | / | /         | Wet-<br>spinning<br>and silver<br>paste                      | 40     | / | 78.1   | 0.5-1    | 0.2                   | 31  | 0.197 | [67] |  |
| PANI/SWNT/Te<br>Nanocomposite                                    | p-<br>type | / | /         | Drop-<br>casting and<br>silver<br>adhesive                   | 40     | / | 101    | 0.2-0.4  | /                     | 100 | /     | [68] |  |
| P3HT                                                             | p-<br>type | / | /         | Drop-<br>casting and<br>doping with<br>Fe(TFSI) <sub>3</sub> | 40     | / | 62.4   | 0.23     | 0.1                   | 100 | /     | [69] |  |
| PANI                                                             | p-<br>type | / | /         |                                                              | Varies | / | Varies | 0.2-0.4  | $2.75 \times 10^{-5}$ | /   | /     | [70] |  |

---

|                                                       |        |   |                            |                                                                   |      |        |       |         |           |      |         |      |
|-------------------------------------------------------|--------|---|----------------------------|-------------------------------------------------------------------|------|--------|-------|---------|-----------|------|---------|------|
| PEDOT globular nanoparticles                          | p-type | / | /                          | /                                                                 | /    | /      | 18.8  | 0.1-0.5 | 0.0188    | /    | /       | [71] |
| PEDOT nanowires                                       | p-type | / | /                          | Spin-coating, treated with EG                                     | /    | /      | 102.7 | 0.258   | 0.09      | /    | /       | [72] |
| PEDOT:PSS (p-type) and Ni wires (n-type)              | Both   | / | Arrays connected in series | Wet-spinning followed by H <sub>2</sub> SO <sub>4</sub> treatment | -263 | 0.0315 | 147.8 | 0.5-1   | 0.05-0.09 | 0.72 | 0.00051 | [73] |
| P3HT-DWCNT                                            | p-type | / | /                          | /                                                                 | 20   | 300    | 176   | 2       | 0.0069    | 33.5 | 0.0145  | [74] |
| rGO/PEDOT                                             |        |   |                            |                                                                   |      |        |       |         |           |      |         |      |
| /TeNW hybrid (p-type) and TeNWs (n-type)              | Both   | / | Arrays connected in series | /                                                                 | 50   | 200    | 143   | 0.21    | 0.21      | 58   | /       | [75] |
| Bi <sub>2</sub> Te <sub>3</sub> nanowire-PEDOT hybrid | n-type | / | /                          | Nanowire-embedded nanofilm                                        | 60   | 400    | 7.45  | 0.047   | 0.048     | 69.5 | 130     | [76] |

---

|                                            |        |   |   |                                     |      |     |       |      |                      |      |         |      |
|--------------------------------------------|--------|---|---|-------------------------------------|------|-----|-------|------|----------------------|------|---------|------|
|                                            |        |   |   | network                             |      |     |       |      |                      |      |         |      |
| Bi <sub>2</sub> Te <sub>3</sub> coated PAN | n-type | / | / | /                                   | 200  | 400 | /     | 12   | 0.07                 | 45.2 | 1.01    | [77] |
| PEDOT:PSS                                  | p-type | / | / | Series connection with silver wires | 75.2 | 400 | 0.045 | 0.12 | $9.5 \times 10^{-5}$ | 4.3  | 0.00125 | [78] |
| PEDOT:PSS                                  | p-type | / | / | Series connection with Ni foils     | 48.5 | 35  | 45    | 0.1  | 0.0013               | 75.2 | /       | [79] |

---

31

32

33

34

35

36

37 **Table S3.** Summary of fabrications strategies and their commonly used materials, advantages and disadvantages

| Fabrication strategies | Materials                                                                                                                                                                                                                                                                                                                                                                                                                                                                                                                                                                                         | Working mechanisms                                                              | Advantages                                                                                                                 | Disadvantages                                                                                                                                         |
|------------------------|---------------------------------------------------------------------------------------------------------------------------------------------------------------------------------------------------------------------------------------------------------------------------------------------------------------------------------------------------------------------------------------------------------------------------------------------------------------------------------------------------------------------------------------------------------------------------------------------------|---------------------------------------------------------------------------------|----------------------------------------------------------------------------------------------------------------------------|-------------------------------------------------------------------------------------------------------------------------------------------------------|
| Wet spinning           | Graphene <sup>80</sup> , carbon nanotube <sup>81</sup> , MXene <sup>82</sup> , PEDOT:PSS <sup>83</sup> , polyarylonitrile <sup>84</sup> , alcohol silk <sup>85</sup> , chitosan <sup>86</sup> , cellulose <sup>87</sup> , and thier composites <sup>88, 89</sup>                                                                                                                                                                                                                                                                                                                                  | Phase separation induced by solvent exchange                                    | High yeild;<br>Low cost;<br>Mild condition;<br>Wide manufacture range for raw materials;<br>Easy control of fibre diameter | Tedious Post-spining process;<br>Fibre diameter is limited to microscale;<br>Washing to remove imputities                                             |
| Dry spinning           | Graphene <sup>90</sup> , carbon nanotube <sup>91</sup> , polyimide <sup>92</sup> , polyamic acid <sup>93</sup> , poly (lactic acid) <sup>94</sup> , ceramic <sup>95</sup> , Au nanowires <sup>96</sup> , chitin <sup>97</sup> , silk <sup>98</sup> , gelatin <sup>99</sup> , cellulose nanocrystal <sup>100</sup> , and thier composites <sup>101</sup>                                                                                                                                                                                                                                           | Evaporation and solidification of the spinning solution.                        | High spring speed;<br>Whiout washing to remove imputities;<br>Opeation is simple;<br>Applying to heat-sensitive polymers   | Flammable solvent hazards;<br>Solvent recovery is needed;<br>Difficult to precisely control section structure of fibres;<br>High heat input           |
| Electro spinning       | Carbon nanotube <sup>102</sup> , graphene oxide <sup>103</sup> , MXene <sup>104</sup> , polyurethane <sup>105</sup> , polyacrylonitrile <sup>106</sup> , polyethylene oxide <sup>107</sup> , polyimide <sup>108</sup> , polyethylene glycol <sup>109</sup> , polyvinyl alcohol <sup>110</sup> , polyvinylidene fluoride <sup>111</sup> , polyvinylidene fluoride-trifluoroethylene nylon <sup>112</sup> , collagen <sup>113</sup> , chitosan <sup>114</sup> , cellulose nanocrystal <sup>115</sup> , silk fabroin <sup>116</sup> , peptide <sup>117</sup> , and thier composites <sup>115</sup> . | Electric field enables migration of charged polymers into nanometer-scale fibre | Production of nanoscale fibres;<br>Wide selection of materials;<br>Control over porosity and morphology;                   | High voltage used;<br>Presence of the volatile solvent;<br>Poor mechanical performances;<br>Low precision in fibre deposition<br>Low biocompatibility |

|                     |                                                                                                                                                                                                                                                                                                                                                                                                                                                                                                                              |                                                                                              |                                                                                                                                                                         |                                                                                                                                                                        |
|---------------------|------------------------------------------------------------------------------------------------------------------------------------------------------------------------------------------------------------------------------------------------------------------------------------------------------------------------------------------------------------------------------------------------------------------------------------------------------------------------------------------------------------------------------|----------------------------------------------------------------------------------------------|-------------------------------------------------------------------------------------------------------------------------------------------------------------------------|------------------------------------------------------------------------------------------------------------------------------------------------------------------------|
| Blow spinning       | <p>Graphene<sup>121</sup>, carbon nanotube<sup>122</sup>, poly(<math>\epsilon</math>-caprolactone)<sup>123</sup>, polystyrene<sup>124</sup>, polyvinyl alcohol<sup>125</sup>, poly(vinylidene fluoride)<sup>126</sup>, poly(vinylidene fluoride-co-hexafluoropropylene)<sup>127</sup>, polylactic acid<sup>128</sup>, polyamic acid<sup>129</sup>, polyacrylonitrile<sup>130</sup>, nylon<sup>131</sup>, carboxymethyl cellulose<sup>132</sup>, cellulose acetate<sup>133</sup>, and their composites<sup>134, 135</sup></p> | <p>High-velocity air stream greatly stretches the extruded polymer solution</p>              | <p>High Production Speed;<br/>Production ultrafine fibres;<br/>Low energy consumption;<br/>Versatile materials selection;<br/>High yield</p>                            | <p>Limited fibre strength;<br/>Low preparation precision;<br/>Limited dimensional accuracy;<br/>An inability to construct 3D configurations;<br/>Complex equipment</p> |
| Rotary jet spinning | <p>Poly(lactic acid)<sup>136</sup>, poly(ethylene oxide)<sup>137</sup>, poly(acrylic acid)<sup>138</sup>, polycaprolactone<sup>139</sup>, gelatin<sup>140</sup>, and their composites<sup>139, 141</sup></p>                                                                                                                                                                                                                                                                                                                 | <p>Extrusion and elongation of polymer solutions into nanofibers under centrifugal force</p> | <p>Creation of fine structures and hierarchies of fibres;<br/>Control over fibre arrangements in three dimensions;<br/>Rapid Production;<br/>Less solvent requires;</p> | <p>Complex equipment;<br/>Low fibre length;<br/>High operation cost;<br/>High energy consumption</p>                                                                   |

|                 |                                                                                                                                                                                                                                                                                                                                                                                                                                                                                                                  |                                                                                         |                                                                                                                                    |                                                                                                                                                      |
|-----------------|------------------------------------------------------------------------------------------------------------------------------------------------------------------------------------------------------------------------------------------------------------------------------------------------------------------------------------------------------------------------------------------------------------------------------------------------------------------------------------------------------------------|-----------------------------------------------------------------------------------------|------------------------------------------------------------------------------------------------------------------------------------|------------------------------------------------------------------------------------------------------------------------------------------------------|
| Melt spinning   | <p>Poly(lactic acid)<sup>142</sup>, polyurethane<sup>143</sup>, polyvinyl alcohol<sup>144</sup>, poly(vinylidene fluoride)<sup>145</sup>, polyethylene terephthalate<sup>146</sup>, polyethylene<sup>147</sup>, polybutylene terephthalate<sup>148</sup>, polyamide<sup>149</sup>, polycaprolactone<sup>150</sup>, poly(lactic acid)/BaTiO<sub>3</sub><sup>151</sup>, polyaniline/polypropylene<sup>152</sup></p>                                                                                                | <p>Rapid cooling processes induced the solidification of molten polymer solutions</p>   | <p>High production speed;<br/>Wide selection of thermoplastic polymers;<br/>Without using solvents;<br/>Uniform fibre diameter</p> | <p>Limited to thermoplastic materials;<br/>Low heat resistance of fibres;<br/>Substantial heat energy requires;<br/>Complex and costly equipment</p> |
| Thermal drawing | <p>Styrene-ethylene-butylene-styrene<sup>15</sup>, carbon-black-loaded polyethylene<sup>153</sup>, poly(vinylidene fluoride)<sup>154</sup>, poly(vinylidene fluoride-co-hexafluoropropylene)<sup>155</sup>, chalcogenide semiconductors (Sn, As-Se-Te-Sn, As-Se-Te),<sup>156</sup> Se nanowires,<sup>1</sup> Piezo-ceramics (PbTiO<sub>3</sub> and BaTiO<sub>3</sub>),<sup>7</sup> liquid metal,<sup>157</sup> lithium-iron-phosphate,<sup>158</sup> lithium bis(trifluoromethane sulfonimide)<sup>159</sup></p> | <p>Viscous flow phenomenon induced by the material's softening at high temperatures</p> | <p>High yield;<br/>Customization;<br/>Versatile materials selection;<br/>Cost-effective;<br/>Sophisticated structures</p>          | <p>High heat energy input;<br/>Limited to thermoplastic polymers;<br/>Equipment complexity;<br/>Front design of preforms</p>                         |



|                      |                                                                                                                                                                                                                                                                                             |                                                                                     |                                                                                                                                    |                                                                                                                               |
|----------------------|---------------------------------------------------------------------------------------------------------------------------------------------------------------------------------------------------------------------------------------------------------------------------------------------|-------------------------------------------------------------------------------------|------------------------------------------------------------------------------------------------------------------------------------|-------------------------------------------------------------------------------------------------------------------------------|
| Dip coating          | Graphene <sup>160</sup> , graphene oxide <sup>161</sup> , carbon nanotube <sup>162</sup> , liquid metal <sup>163</sup> , PEDOT:PSS <sup>164</sup> , polyaniline <sup>165</sup> , polypyrrole <sup>166</sup> , Ag or Au nanoparticles or nanowires, <sup>167, 168</sup> MXene <sup>169</sup> | Evaporation of solvents enables formation of functional layers                      | Simple process;<br>A variety of materials selection;<br>Control over coating thickness;<br>Adaptable for different types of fibres | Time-consuming drying;<br>Poor reproducibility;<br>Specialized equipment;<br>Solvent hazards                                  |
| Electrospray coating | Carbon nanotube <sup>170</sup> , graphene oxide <sup>171</sup> , MXene <sup>172</sup> , Ag nanowires <sup>173</sup> , PEDOT:PSS <sup>174</sup> , polyaniline <sup>175</sup> , polycaprolactone <sup>176</sup> , silk <sup>177</sup>                                                         | Applied electric field induces Coulombic fission of liquid droplets                 | Production of fine fibres;<br>High surface area of fibres;<br>Control over fibre's diameter, alignment, and porosity               | Complex equipment;<br>Low production rate;<br>Limited to scale production;<br>Poor uniformity                                 |
| Compression coating  | Graphene <sup>178</sup> , MXene <sup>179</sup>                                                                                                                                                                                                                                              | Application of pressure to force coating materials onto fibrous substrates          | Adhesion enhancement;<br>Fast and efficient process;<br>Low materials wastage                                                      | Limited coating materials;<br>Specialized fibre substrate;<br>Difficult to control coating thickness                          |
| Screen printing      | Carbon nanotube <sup>180</sup> , graphene <sup>181</sup> , graphene oxide <sup>182</sup> , MXene <sup>183</sup> , Ag nanoparticles or nanowires <sup>184</sup>                                                                                                                              | Use of pressure to allow ink to pass through the open areas onto the fabric surface | High durability;<br>Large-scale production;<br>Custom design                                                                       | Limited inks;<br>Inapplicable to intricate designs;<br>Limited color range;<br>Low stretchability and breathability of fibres |

|                           |                                                                                                                                                                                                                                                                                                                                                                         |                                                                                       |                                                                                                                               |                                                                                                                                                       |
|---------------------------|-------------------------------------------------------------------------------------------------------------------------------------------------------------------------------------------------------------------------------------------------------------------------------------------------------------------------------------------------------------------------|---------------------------------------------------------------------------------------|-------------------------------------------------------------------------------------------------------------------------------|-------------------------------------------------------------------------------------------------------------------------------------------------------|
| 3D printing               | Graphene <sup>185</sup> , carbon nanotube <sup>186</sup> , liquid metal <sup>187</sup> , PEDOT:PSS <sup>188</sup> , MXene <sup>189</sup> , boron nitride <sup>190</sup> , poly(vinylidene fluoride) <sup>191</sup> , poly(vinyl alcohol) <sup>192</sup> , thermoplastic polyurethane <sup>193</sup> , silk fibroin <sup>194</sup> , cellulose nanofibril <sup>195</sup> | Layer-by-layer assembly coupled with digital design                                   | Complex geometries;<br>Customization;<br>On-demand production                                                                 | Limited material options;<br>Low print speed;<br>High cost                                                                                            |
| Chemical vapor deposition | Graphene <sup>196</sup> , carbon nanotube <sup>186</sup> , boron nitride <sup>190</sup> , PEDOT <sup>197</sup> , polypyrrole <sup>198</sup> , poly(3-alkylthiophene) <sup>199</sup>                                                                                                                                                                                     | Deposition of thin films on substrates by the chemical reaction of gaseous precursors | High purity;<br>Uniform coating;<br>Low waste;<br>Good reproducibility;<br>Improved tensile strength and durability of fibres | High cost;<br>Difficult for large-scale production;<br>Time-consuming;<br>Hazardous chemicals;<br>High energy input;<br>Limited flexibility of fibres |
| Chemical reduction        | Graphene oxide <sup>200</sup> , Ag and Au nanoparticles or nanowires <sup>201</sup>                                                                                                                                                                                                                                                                                     | Removal of oxygen or the addition of hydrogen                                         | High durability of fibres;<br>Precise control over fibre's properties;<br>Large-scale manufacturing                           | Use of harsh chemicals;<br>Energy consumption;<br>Washing to remove residues in fibres;<br>Difficult to control fibre's quality                       |

---

1. W. Yan, Y. Qu, T. D. Gupta, A. Darga, D. T. Nguyễn, A. G. Page, M. Rossi, M. Ceriotti and F. Sorin, *Advanced Materials*, 2017, **29**, 1700681.
2. X. Ji, R. L. Page, S. Chaudhuri, W. Liu, S. Y. Yu, S. E. Mohny, J. V. Badding and V. Gopalan, *Advanced Optical Materials*, 2017, **5**, 1600592.
3. G. Tang, Q. Qian, X. Wen, X. Chen, W. Liu, M. Sun and Z. Yang, *Optics express*, 2015, **23**, 23624-23633.
4. M. Bayindir, F. Sorin, A. F. Abouraddy, J. Viens, S. D. Hart, J. D. Joannopoulos and Y. Fink, *Nature*, 2004, **431**, 826-829.
5. A. F. Abouraddy, O. Shapira, M. Bayindir, J. Arnold, F. Sorin, D. S. Hinczewski, J. D. Joannopoulos and Y. Fink, *Nature materials*, 2006, **5**, 532-536.
6. S. Egusa, Z. Wang, N. Chocat, Z. Ruff, A. Stolyarov, D. Shemuly, F. Sorin, P. Rakich, J. Joannopoulos and Y. Fink, *Nature materials*, 2010, **9**, 643-648.
7. W. Yan, G. Noel, G. Loke, E. Meiklejohn, T. Khudiyev, J. Marion, G. Rui, J. Lin, J. Cherston and A. Sahasrabudhe, *Nature*, 2022, **603**, 616-623.
8. Y. Su, W. Li, L. Yuan, C. Chen, H. Pan, G. Xie, G. Conta, S. Ferrier, X. Zhao and G. Chen, *Nano Energy*, 2021, **89**, 106321.
9. Y. Su, C. Chen, H. Pan, Y. Yang, G. Chen, X. Zhao, W. Li, Q. Gong, G. Xie and Y. Zhou, *Advanced Functional Materials*, 2021, **31**, 2010962.
10. Y. Ma, J. Ouyang, T. Raza, P. Li, A. Jian, Z. Li, H. Liu, M. Chen, X. Zhang and L. Qu, *Nano Energy*, 2021, **85**, 105941.
11. A. Leber, C. Dong, R. Chandran, T. Das Gupta, N. Bartolomei and F. Sorin, *Nature Electronics*, 2020, **3**, 316-326.
12. Y. Luo, Y. Li, P. Sharma, W. Shou, K. Wu, M. Foshey, B. Li, T. Palacios, A. Torralba and W. Matusik, *Nature Electronics*, 2021, **4**, 193-201.
13. M. Clevenger, H. Kim, H. W. Song, K. No and S. Lee, *Science Advances*, 2021, **7**, eabj8958.
14. R. Lin, H.-J. Kim, S. Achavananthadith, Z. Xiong, J. K. Lee, Y. L. Kong and J. S. Ho, *Nature communications*, 2022, **13**, 2190.
15. M. Chen, Z. Wang, Q. Zhang, Z. Wang, W. Liu, M. Chen and L. Wei, *Nature Communications*, 2021, **12**, 1416.
16. P. Chen, Y. Xu, S. He, X. Sun, W. Guo, Z. Zhang, L. Qiu, J. Li, D. Chen and H. Peng, *Advanced Materials*, 2015, **27**, 1042-1047.
17. A. Maziz, A. Concas, A. Khaldi, J. Stålhand, N.-K. Persson and E. W. Jager, *Science advances*, 2017, **3**, e1600327.
18. P. Chen, Y. Xu, S. He, X. Sun, S. Pan, J. Deng, D. Chen and H. Peng, *Nature nanotechnology*, 2015, **10**, 1077-1083.
19. X. A. Zhang, S. Yu, B. Xu, M. Li, Z. Peng, Y. Wang, S. Deng, X. Wu, Z. Wu and M. Ouyang, *Science*, 2019, **363**, 619-623.
20. C. S. Haines, M. D. Lima, N. Li, G. M. Spinks, J. Foroughi, J. D. Madden, S. H.

- Kim, S. Fang, M. Jung de Andrade and F. Göktepe, *science*, 2014, **343**, 868-872.
21. X. Shi, Y. Zuo, P. Zhai, J. Shen, Y. Yang, Z. Gao, M. Liao, J. Wu, J. Wang and X. Xu, *Nature*, 2021, **591**, 240-245.
  22. M. Rein, V. D. Favrod, C. Hou, T. Khudiyev, A. Stolyarov, J. Cox, C.-C. Chung, C. Chhav, M. Ellis and J. Joannopoulos, *Nature*, 2018, **560**, 214-218.
  23. S. Niu, N. Matsuhisa, L. Beker, J. Li, S. Wang, J. Wang, Y. Jiang, X. Yan, Y. Yun and W. Burnett, *Nature Electronics*, 2019, **2**, 361-368.
  24. X. Tian, P. M. Lee, Y. J. Tan, T. L. Wu, H. Yao, M. Zhang, Z. Li, K. A. Ng, B. C. Tee and J. S. Ho, *Nature Electronics*, 2019, **2**, 243-251.
  25. A. Hajiaghajani, A. H. Afandizadeh Zargari, M. Dautta, A. Jimenez, F. Kurdahi and P. Tseng, *Nature Electronics*, 2021, **4**, 808-817.
  26. P. Liu, Z. Gao, L. Xu, X. Shi, X. Fu, K. Li, B. Zhang, X. Sun and H. Peng, *Journal of Materials Chemistry A*, 2018, **6**, 19947-19953.
  27. N. Zhang, F. Huang, S. Zhao, X. Lv, Y. Zhou, S. Xiang, S. Xu, Y. Li, G. Chen and C. Tao, *Matter*, 2020, **2**, 1260-1269.
  28. R. Li, X. Xiang, X. Tong, J. Zou and Q. Li, *Advanced Materials*, 2015, **27**, 3831-3835.
  29. M. Zhang, T. Gao, J. Wang, J. Liao, Y. Qiu, Q. Yang, H. Xue, Z. Shi, Y. Zhao and Z. Xiong, *Nano Energy*, 2015, **13**, 298-305.
  30. K. Dong, J. Deng, Y. Zi, Y. C. Wang, C. Xu, H. Zou, W. Ding, Y. Dai, B. Gu and B. Sun, *Advanced Materials*, 2017, **29**, 1702648.
  31. R. Wang, Z. Du, Z. Xia, J. Liu, P. Li, Z. Wu, Y. Yue, Y. Xiang, J. Meng and D. Liu, *Advanced Functional Materials*, 2022, **32**, 2107682.
  32. T. Ding, K. H. Chan, Y. Zhou, X.-Q. Wang, Y. Cheng, T. Li and G. W. Ho, *Nature communications*, 2020, **11**, 6006.
  33. N. Komatsu, Y. Ichinose, O. S. Dewey, L. W. Taylor, M. A. Trafford, Y. Yomogida, G. Wehmeyer, M. Pasquali, K. Yanagi and J. Kono, *Nature Communications*, 2021, **12**, 4931.
  34. J. He, C. Lu, H. Jiang, F. Han, X. Shi, J. Wu, L. Wang, T. Chen, J. Wang and Y. Zhang, *Nature*, 2021, **597**, 57-63.
  35. L. Wang, J. Pan, Y. Zhang, X. Cheng, L. Liu and H. Peng, *Advanced Materials*, 2018, **30**, 1704378.
  36. X. Xiao, X. Xiao, Y. Zhou, X. Zhao, G. Chen, Z. Liu, Z. Wang, C. Lu, M. Hu and A. Nashalian, *Science advances*, 2021, **7**, eabl3742.
  37. L. Cai, A. Y. Song, P. Wu, P.-C. Hsu, Y. Peng, J. Chen, C. Liu, P. B. Catrysse, Y. Liu and A. Yang, *Nature communications*, 2017, **8**, 496.
  38. P.-C. Hsu, X. Liu, C. Liu, X. Xie, H. R. Lee, A. J. Welch, T. Zhao and Y. Cui, *Nano letters*, 2015, **15**, 365-371.
  39. M. Shi, M. Shen, X. Guo, X. Jin, Y. Cao, Y. Yang, W. Wang and J. Wang, *ACS*

- nano*, 2021, **15**, 11396-11405.
40. L. Cai, A. Y. Song, W. Li, P. C. Hsu, D. Lin, P. B. Catrysse, Y. Liu, Y. Peng, J. Chen and H. Wang, *Advanced Materials*, 2018, **30**, 1802152.
  41. S. Zeng, S. Pian, M. Su, Z. Wang, M. Wu, X. Liu, M. Chen, Y. Xiang, J. Wu and M. Zhang, *Science*, 2021, **373**, 692-696.
  42. T. Gao, Z. Yang, C. Chen, Y. Li, K. Fu, J. Dai, E. M. Hitz, H. Xie, B. Liu and J. Song, *ACS nano*, 2017, **11**, 11513-11520.
  43. Z. Zhang, K. Guo, Y. Li, X. Li, G. Guan, H. Li, Y. Luo, F. Zhao, Q. Zhang and B. Wei, *Nature Photonics*, 2015, **9**, 233-238.
  44. Y. Wu, S. S. Mechael, C. Lerma, R. S. Carmichael and T. B. Carmichael, *Matter*, 2020, **2**, 882-895.
  45. S. Seyedin, S. Uzun, A. Levitt, B. Anasori, G. Dion, Y. Gogotsi and J. M. Razal, *Advanced Functional Materials*, 2020, **30**, 1910504.
  46. K. Meng, S. Zhao, Y. Zhou, Y. Wu, S. Zhang, Q. He, X. Wang, Z. Zhou, W. Fan and X. Tan, *Matter*, 2020, **2**, 896-907.
  47. M. Zhang, K. Liu, J. Xu, P. Wang, J. Sun, W. Ding, C. Wang and K. Zhang, *ACS sensors*, 2022, **7**, 2634-2644.
  48. L. Wang, L. Wang, Y. Zhang, J. Pan, S. Li, X. Sun, B. Zhang and H. Peng, *Advanced Functional Materials*, 2018, **28**, 1804456.
  49. S. Pyo, J. Lee, W. Kim, E. Jo and J. Kim, *Advanced Functional Materials*, 2019, **29**, 1902484.
  50. S. Choi, K. Yoon, S. Lee, H. J. Lee, J. Lee, D. W. Kim, M. S. Kim, T. Lee and C. Pang, *Advanced Functional Materials*, 2019, **29**, 1905808.
  51. J. Lee, H. Kwon, J. Seo, S. Shin, J. H. Koo, C. Pang, S. Son, J. H. Kim, Y. H. Jang and D. E. Kim, *Advanced materials*, 2015, **27**, 2433-2439.
  52. G. Loke, T. Khudiyev, B. Wang, S. Fu, S. Payra, Y. Shaoul, J. Fung, I. Chatziveroglou, P.-W. Chou and I. Chinn, *Nature communications*, 2021, **12**, 3317.
  53. S. Ham, M. Kang, S. Jang, J. Jang, S. Choi, T.-W. Kim and G. Wang, *Science advances*, 2020, **6**, eaba1178.
  54. X. Zeng, L. Ren, J. Xie, D. Mao, M. Wang, X. Zeng, G. Du, R. Sun, J.-B. Xu and C.-P. Wong, *ACS applied materials & interfaces*, 2019, **11**, 37892-37900.
  55. F. Ren, P. Menchhofer, J. Kiggans and H. Wang, *Journal of Electronic Materials*, 2016, **45**, 1412-1418.
  56. Y. Li, K. Buddharaju, B. C. Tinh, N. Singh and S. J. Lee, *IEEE electron device letters*, 2012, **33**, 715-717.
  57. A. Morata, M. Pacios, G. Gadea, C. Flox, D. Cadavid, A. Cabot and A. Tarancón, *Nature communications*, 2018, **9**, 4759.
  58. T. Zhang, K. Li, J. Zhang, M. Chen, Z. Wang, S. Ma, N. Zhang and L. Wei,

- Nano Energy*, 2017, **41**, 35-42.
59. S. Shin, R. Kumar, J. W. Roh, D.-S. Ko, H.-S. Kim, S. I. Kim, L. Yin, S. M. Schlossberg, S. Cui and J.-M. You, *Scientific reports*, 2017, **7**, 7317.
  60. D. Liang, H. Yang, S. W. Finefrock and Y. Wu, *Nano letters*, 2012, **12**, 2140-2145.
  61. J. Lee, A. Liao, E. Pop and W. P. King, *Nano letters*, 2009, **9**, 1356-1361.
  62. Z. Lu, H. Zhang, C. Mao and C. M. Li, *Applied energy*, 2016, **164**, 57-63.
  63. S. J. Kim, J. H. We and B. J. Cho, *Energy & Environmental Science*, 2014, **7**, 1959-1965.
  64. B. Wu, Y. Guo, C. Hou, Q. Zhang, Y. Li and H. Wang, *Advanced Functional Materials*, 2019, **29**, 1900304.
  65. Y. Lu, Y. Ding, Y. Qiu, K. Cai, Q. Yao, H. Song, L. Tong, J. He and L. Chen, *ACS applied materials & interfaces*, 2019, **11**, 12819-12829.
  66. Q. Xu, S. Qu, C. Ming, P. Qiu, Q. Yao, C. Zhu, T.-R. Wei, J. He, X. Shi and L. Chen, *Energy & Environmental Science*, 2020, **13**, 511-518.
  67. H. Xu, Y. Guo, B. Wu, C. Hou, Q. Zhang, Y. Li and H. Wang, *ACS applied materials & interfaces*, 2020, **12**, 33297-33304.
  68. L. Wang, Q. Yao, W. Shi, S. Qu and L. Chen, *Materials Chemistry Frontiers*, 2017, **1**, 741-748.
  69. S. Qu, Q. Yao, L. Wang, Z. Chen, K. Xu, H. Zeng, W. Shi, T. Zhang, C. Uher and L. Chen, *NPG Asia Materials*, 2016, **8**, e292-e292.
  70. J. Wu, Y. Sun, W. Xu and Q. Zhang, *Synthetic metals*, 2014, **189**, 177-182.
  71. X. Hu, G. Chen, X. Wang and H. Wang, *Journal of Materials Chemistry A*, 2015, **3**, 20896-20902.
  72. K. Zhang, J. Qiu and S. Wang, *Nanoscale*, 2016, **8**, 8033-8041.
  73. N. Wen, Z. Fan, S. Yang, Y. Zhao, T. Cong, S. Xu, H. Zhang, J. Wang, H. Huang and C. Li, *Nano Energy*, 2020, **78**, 105361.
  74. C. J. An, Y. C. Lee, Y. H. Kang and S. Y. Cho, *Carbon*, 2017, **124**, 662-668.
  75. J. Choi, J. Y. Lee, S. S. Lee, C. R. Park and H. Kim, *Advanced Energy Materials*, 2016, **6**, 1502181.
  76. W. Thongkham, C. Lertsatitthanakorn, K. Jiramitmongkon, K. Tantisantisom, T. Boonkoom, M. Jitpukdee, K. Sinthiptharakoon, A. Klamchuen, M. Liangruksa and P. Khanchaitit, *ACS applied materials & interfaces*, 2019, **11**, 6624-6633.
  77. J. A. Lee, A. E. Aliev, J. S. Bykova, M. J. de Andrade, D. Kim, H. J. Sim, X. Lepró, A. A. Zakhidov, J.-B. Lee and G. M. Spinks, *Advanced Materials*, 2016, **28**, 5038-5044.
  78. Y. Du, K. Cai, S. Chen, H. Wang, S. Z. Shen, R. Donelson and T. Lin, *Scientific reports*, 2015, **5**, 6411.
  79. K. Kirihara, Q. Wei, M. Mukaida and T. Ishida, *Synthetic Metals*, 2017, **225**, 41-

- 48.
80. R. Jalili, S. H. Aboutalebi, D. Esrafilzadeh, R. L. Shepherd, J. Chen, S. Aminorroaya-Yamini, K. Konstantinov, A. I. Minett, J. M. Razal and G. G. Wallace, *Advanced functional materials*, 2013, **23**, 5345-5354.
81. J. Im, Y. H. Jeong, M. C. Kim, D. Oh, J. Son, K. Hyun, B. Jeong, S. Hong and J. Lee, *Carbon*, 2024, **216**, 118532.
82. W. Eom, H. Shin, R. B. Ambade, S. H. Lee, K. H. Lee, D. J. Kang and T. H. Han, *Nature communications*, 2020, **11**, 2825.
83. R. Sarabia-Riquelme, M. Shahi, J. W. Brill and M. C. Weisenberger, *ACS Applied Polymer Materials*, 2019, **1**, 2157-2167.
84. H.-L. Nie, Z.-H. Ma, Z.-X. Fan, C. J. Branford-White, X. Ning, L.-M. Zhu and J. Han, *International journal of pharmaceutics*, 2009, **373**, 4-9.
85. Y. Yao, B. J. Allardyce, R. Rajkhowa, D. Hegh, S. Qin, K. A. S. Usman, P. Mota-Santiago, J. Zhang, P. Lynch and X. Wang, *Macromolecular Rapid Communications*, 2022, **43**, 2100891.
86. V. E. Yudin, I. P. Dobrovolskaya, I. M. Neelov, E. N. Dresvyanina, P. V. Popryadukhin, E. M. Ivan'kova, V. Y. Elokhovskii, I. A. Kasatkin, B. M. Okrugin and P. Morganti, *Carbohydrate polymers*, 2014, **108**, 176-182.
87. B. Pingrey and Y.-L. Hsieh, *Biomacromolecules*, 2022, **23**, 1269-1277.
88. A. Ota, R. Beyer, U. Hageroth, A. Müller, P. Tomasic, F. Hermanutz and M. R. Buchmeiser, *Polymers for Advanced Technologies*, 2021, **32**, 335-342.
89. S.-W. Ha, Y. H. Park and S. M. Hudson, *Biomacromolecules*, 2003, **4**, 488-496.
90. Q. Tian, Z. Xu, Y. Liu, B. Fang, L. Peng, J. Xi, Z. Li and C. Gao, *Nanoscale*, 2017, **9**, 12335-12342.
91. Q. Zhang, D.-G. Wang, J.-Q. Huang, W.-P. Zhou, G.-H. Luo, W.-Z. Qian and F. Wei, *Carbon*, 2010, **48**, 2855-2861.
92. Y. Xu, S. Wang, Z. Li, Q. Xu and Q. Zhang, *Journal of Materials Science*, 2013, **48**, 7863-7868.
93. S. K. Park and R. J. Farris, *Polymer*, 2001, **42**, 10087-10093.
94. B. Gupta, N. Revagade, N. Anjum, B. Atthoff and J. Hilborn, *Journal of applied polymer science*, 2006, **100**, 1239-1246.
95. H. Scholz, J. Vetter, R. Herborn and A. Ruedinger, *International Journal of Applied Ceramic Technology*, 2020, **17**, 1636-1645.
96. B. Reiser, D. Gerstner, L. Gonzalez-Garcia, J. H. Maurer, I. Kanelidis and T. Kraus, *ACS nano*, 2017, **11**, 4934-4942.
97. L. Szosland and G. East, *Journal of applied polymer science*, 1995, **58**, 2459-2466.
98. M. Y. Wang, J. P. Zhang, S. L. Chen, B. Qi, X. Y. Yao, X. H. Zhang, Y. T. Li and Z. H. Yang, *Macromolecular Rapid Communications*, 2023, 2300024.

99. T. Chaochai, Y. Imai, T. Furuike and H. Tamura, *Fibers*, 2016, **4**, 2.
100. C. M. Clarkson and J. P. Youngblood, *Green Materials*, 2018, **6**, 6-14.
101. Y. Zhao, D. Dong, Y. Wang, S. Gong, T. An, L. W. Yap and W. Cheng, *ACS Applied Materials & Interfaces*, 2018, **10**, 42612-42620.
102. Y. Dror, W. Salalha, R. L. Khalfin, Y. Cohen, A. L. Yarin and E. Zussman, *Langmuir*, 2003, **19**, 7012-7020.
103. J.-Y. Lyu, S. Chen, W. He, X.-X. Zhang, D.-y. Tang, P.-J. Liu and Q.-L. Yan, *Chemical Engineering Journal*, 2019, **368**, 129-137.
104. A. Levitt, S. Seyedin, J. Zhang, X. Wang, J. M. Razal, G. Dion and Y. Gogotsi, *Small*, 2020, **16**, 2002158.
105. M. M. Demir, I. Yilgor, E. Yilgor and B. Erman, *Polymer*, 2002, **43**, 3303-3309.
106. C. Wang, H.-S. Chien, C.-H. Hsu, Y.-C. Wang, C.-T. Wang and H.-A. Lu, *Macromolecules*, 2007, **40**, 7973-7983.
107. W. K. Son, J. H. Youk, T. S. Lee and W. H. Park, *polymer*, 2004, **45**, 2959-2966.
108. J. Lasprilla-Botero, M. Alvarez-Lainez and J. Lagaron, *Materials Today Communications*, 2018, **14**, 1-9.
109. C. Chen, L. Wang and Y. Huang, *Polymer*, 2007, **48**, 5202-5207.
110. F. Cengiz, T. A. Dao and O. Jirsak, *Polymer Engineering & Science*, 2010, **50**, 936-943.
111. Z. Li, Y. Xu, L. Fan, W. Kang and B. Cheng, *Materials & design*, 2016, **92**, 95-101.
112. R. D'Anniballe, A. Zucchelli and R. Carloni, *Nanomaterials*, 2021, **11**, 172.
113. J. A. Matthews, G. E. Wnek, D. G. Simpson and G. L. Bowlin, *Biomacromolecules*, 2002, **3**, 232-238.
114. A. Neamnark, R. Rujiravanit and P. Supaphol, *Carbohydrate polymers*, 2006, **66**, 298-305.
115. S. S. Nair and A. P. Mathew, *Carbohydrate polymers*, 2017, **175**, 149-157.
116. S. H. Kim, Y. S. Nam, T. S. Lee and W. H. Park, *Polymer Journal*, 2003, **35**, 185-190.
117. M. Maleki, A. Natalello, R. Pugliese and F. Gelain, *Acta biomaterialia*, 2017, **51**, 268-278.
118. J. Zhou, C. Cao, X. Ma and J. Lin, *International journal of biological macromolecules*, 2010, **47**, 514-519.
119. W. L. E. Magalhaes, X. Cao and L. A. Lucia, *Langmuir*, 2009, **25**, 13250-13257.
120. Y. Yang, A. Centrone, L. Chen, F. Simeon, T. A. Hatton and G. C. Rutledge, *Carbon*, 2011, **49**, 3395-3403.
121. S. Liu, Y. Wang, X. Ming, Z. Xu, Y. Liu and C. Gao, *Nano letters*, 2021, **21**, 5116-5125.
122. E. Kuk, Y. M. Ha, J. Yu, I. T. Im, Y. Kim and Y. C. Jung, *Macromolecular*



- Materials and Engineering*, 2016, **301**, 364-370.
123. K. Czarnecka, M. Wojasiński, T. Ciach and P. Sajkiewicz, *Materials*, 2021, **14**, 1463.
  124. X. Zhang, J. Lv, X. Yin, Z. Li, Q. Lin and L. Zhu, *Applied Physics A*, 2018, **124**, 1-10.
  125. A. M. Santos, E. L. Medeiros, J. J. Blaker and E. S. Medeiros, *Materials Letters*, 2016, **176**, 122-126.
  126. R. Atif, M. Combrinck, J. Khaliq, A. H. Hassanin, N. Shehata, E. Elnabawy and I. Shyha, *Polymers*, 2020, **12**, 1140.
  127. D. H. Ho, S. Cheon, P. Hong, J. H. Park, J. W. Suk, D. H. Kim, J. T. Han and J. H. Cho, *Advanced Functional Materials*, 2019, **29**, 1900025.
  128. D. D. da Silva Parize, J. E. de Oliveira, M. M. Foschini, J. M. Marconcini and L. H. C. Mattoso, *Journal of Applied Polymer Science*, 2016, **133**.
  129. J. Li, G. Song, J. Yu, Y. Wang, J. Zhu and Z. Hu, *Nanomaterials*, 2017, **7**, 395.
  130. T. A. Khattab, M. E. El-Naggar, A. G. Al-Sehemi, M. Pannipara, M. Abu-Saied and M. F. A. Taleb, *Cellulose*, 2022, **29**, 6181-6192.
  131. Z. Yang, C. Shen, Y. Zou, D. Wu, H. Zhang and K. Chen, *Foods*, 2021, **10**, 2339.
  132. C. Shen, X. Yang, D. Wang, J. Li, C. Zhu, D. Wu and K. Chen, *Carbohydrate Polymers*, 2024, **326**, 121636.
  133. A. Kramar, T. Luxbacher and J. González-Benito, *Carbohydrate Polymers*, 2023, **320**, 121225.
  134. J. Zhang, H. Kitayama, Y. Gotoh, A. Potthast and T. Rosenau, *Carbohydrate polymers*, 2019, **226**, 115258.
  135. G. C. Dadol, A. Kilic, L. D. Tijing, K. J. A. Lim, L. K. Cabatingan, N. P. B. Tan, E. Stojanovska and Y. Polat, *Materials Today Communications*, 2020, **25**, 101656.
  136. J. C. Rosa, J. J. Bonvent and A. R. Santos Jr, *Journal of Biomaterials Applications*, 2022, **36**, 1641-1651.
  137. M. Schabikowski, J. Tomaszewska, D. Kata and T. Graule, *Textile Research Journal*, 2015, **85**, 316-324.
  138. S. Khandavalli, Y. Chen, N. Sharma-Nene, K. S. Rajan, S. Sur, J. P. Rothstein, K. S. Reeves, D. A. Cullen, K. C. Neyerlin and S. A. Mauger, *Journal of Polymer Science*, 2023.
  139. S. A. de Andrade Pinto, F. J. de Nadai Dias, G. Brasil Camargo Cardoso, A. R. dos Santos Junior, A. A. de Aro, D. S. Pino, D. H. Meneghetti, R. P. Vitti, G. M. T. Dos Santos and C. A. de Carvalho Zavaglia, *Cells Tissues Organs*, 2022, **211**, 477-491.
  140. M. B. Guner, A. D. Dalgic, A. Tezcaner, S. Yilanci and D. Keskin, *Biomedical Materials*, 2020, **15**, 065014.

141. M. M. Machado-Paula, M. A. Corat, L. M. De Vasconcellos, J. C. Araújo, G. Mi, P. Ghannadian, T. V. Toniato, F. R. Marciano, T. J. Webster and A. O. Lobo, *ACS Applied Bio Materials*, 2022, **5**, 1013-1024.
142. C. R. Gajjar, J. W. Stallrich, M. A. Pasquinelli and M. W. King, *ACS omega*, 2021, **6**, 15920-15928.
143. J. González, M. Ardanuy, M. González, R. Rodriguez and P. Jovančić, *Textile Research Journal*, 2023, **93**, 957-970.
144. Q. Wu, N. Chen, L. Li and Q. Wang, *Journal of applied polymer science*, 2012, **124**, 421-428.
145. W. Steinmann, S. Walter, G. Seide, T. Gries, G. Roth and M. Schubnell, *Journal of Applied Polymer Science*, 2011, **120**, 21-35.
146. R. Tomisawa, T. Ikaga, K. Kim, Y. Ohkoshi, K. Okada, H. Masunaga, T. Kanaya, M. Masuda and Y. Maeda, *Polymer*, 2017, **116**, 367-377.
147. M. Kakiage and D. Fukagawa, *Materials Today Communications*, 2020, **23**, 100864.
148. X. Shi, H. Ito and T. Kikutani, *Polymer*, 2006, **47**, 611-616.
149. E. Giza, H. Ito, T. Kikutani and N. Okui, *Journal of Macromolecular Science, Part B*, 2000, **39**, 545-559.
150. N. E. Zander, *Journal of Applied Polymer Science*, 2015, **132**.
151. H. J. Oh, D.-K. Kim, Y. C. Choi, S.-J. Lim, J. B. Jeong, J. H. Ko, W.-G. Hahm, S.-W. Kim, Y. Lee and H. Kim, *Scientific reports*, 2020, **10**, 16339.
152. A. Soroudi, M. Skrifvars and H. Liu, *Journal of Applied Polymer Science*, 2011, **119**, 558-564.
153. Y. Qu, T. Nguyen-Dang, A. G. Page, W. Yan, T. Das Gupta, G. M. Rotaru, R. M. Rossi, V. D. Favrod, N. Bartolomei and F. Sorin, *Advanced Materials*, 2018, **30**, 1707251.
154. Z. Wang, T. Wu, Z. Wang, T. Zhang, M. Chen, J. Zhang, L. Liu, M. Qi, Q. Zhang and J. Yang, *Nature Communications*, 2020, **11**, 3842.
155. T. Khudiyev, J. Clayton, E. Levy, N. Chocat, A. Gumennik, A. M. Stolyarov, J. Joannopoulos and Y. Fink, *Nature communications*, 2017, **8**, 1435.
156. G. Loke, W. Yan, T. Khudiyev, G. Noel and Y. Fink, *Advanced Materials*, 2020, **32**, 1904911.
157. C. Dong, A. Leber, T. Das Gupta, R. Chandran, M. Volpi, Y. Qu, T. Nguyen-Dang, N. Bartolomei, W. Yan and F. Sorin, *Nature communications*, 2020, **11**, 3537.
158. T. Khudiyev, B. Grena, G. Loke, C. Hou, H. Jang, J. Lee, G. H. Noel, J. Alain, J. Joannopoulos and K. Xu, *Materials Today*, 2022, **52**, 80-89.
159. T. Khudiyev, J. T. Lee, J. R. Cox, E. Argentieri, G. Loke, R. Yuan, G. H. Noel, R. Tataru, Y. Yu and F. Logan, *Advanced Materials*, 2020, **32**, 2004971.

160. J. Liu, L. Hua, S. Li and M. Yu, *Applied Surface Science*, 2015, **327**, 241-245.
161. M. Fang, X. Xiong, Y. Hao, T. Zhang, H. Wang, H.-M. Cheng and Y. Zeng, *Journal of Materials Science & Technology*, 2019, **35**, 1989-1995.
162. F. Mirri, A. W. Ma, T. T. Hsu, N. Behabtu, S. L. Eichmann, C. C. Young, D. E. Tsentelovich and M. Pasquali, *ACS nano*, 2012, **6**, 9737-9744.
163. Q. Zhang, D. J. Roach, L. Geng, H. Chen, H. J. Qi and D. Fang, *Smart Materials and Structures*, 2018, **27**, 035019.
164. S. Yamamoto, R. Miyako, R. Maeda, Y. Ishizaki and M. Mitsuishi, *Macromolecular Materials and Engineering*, 2023, **308**, 2300247.
165. A. Sharma, I. Rawal, A. Rajpal, A. Khokhar, V. Kumar and P. K. Goyal, *Journal of Materials Science: Materials in Electronics*, 2022, **33**, 14071-14085.
166. X. Huang, Y.-H. Yu, O. L. de Llergo, S. M. Marquez and Z. Cheng, *RSC advances*, 2017, **7**, 9495-9499.
167. J. Feng, H. Xia, F. You, H. Mao, X. Ma, H. Tao, X. Zhao and M.-C. Wang, *Journal of Alloys and Compounds*, 2018, **735**, 607-612.
168. D. Pu, W. Zhou, Y. Li, J. Chen, J. Chen, H. Zhang, B. Mi, L. Wang and Y. Ma, *RSC advances*, 2015, **5**, 100725-100729.
169. P. Salles, D. Pinto, K. Hantanasirisakul, K. Maleski, C. E. Shuck and Y. Gogotsi, *Advanced Functional Materials*, 2019, **29**, 1809223.
170. Y. Meng, G. Xin, J. Nam, S. M. Cho and H. Chae, *Journal of Nanoscience and Nanotechnology*, 2013, **13**, 6125-6129.
171. M. Mustafa, M. N. Awais, G. Pooniah, K. H. Choi, J. Ko and Y. H. Doh, *Journal of the Korean Physical Society*, 2012, **61**, 470-475.
172. S. Cho, D. Y. Kim and Y. Seo, *Advanced Materials Interfaces*, 2020, **7**, 2000750.
173. J. Y. Song, J. H. Oh, D. Choi and S. M. Park, *Scientific reports*, 2021, **11**, 21437.
174. M. P. Moniz, A. Rafique, J. Carmo, J. Oliveira, A. Marques, I. M. Ferreira and A. C. Baptista, *ACS Applied Materials & Interfaces*, 2023.
175. P. M. Bigwarfe Jr, T. P. White and T. D. Wood, *Rapid communications in mass spectrometry*, 2002, **16**, 2266-2272.
176. S. Zhang, C. Campagne and F. Salaün, *Applied Sciences*, 2019, **9**, 402.
177. Y. Luo, Y. Li, X. Feng, Y. Pei, Z. Zhang, L. Wang, Y. Zhao, B. Lu and B. Zhu, *Nano Energy*, 2020, **75**, 104974.
178. K. H. Kim, Y. Oh and M. Islam, *Nature nanotechnology*, 2012, **7**, 562-566.
179. Y. Z. Zhang, Y. Wang, Q. Jiang, J. K. El-Demellawi, H. Kim and H. N. Alshareef, *Advanced Materials*, 2020, **32**, 1908486.
180. X. Cao, H. Chen, X. Gu, B. Liu, W. Wang, Y. Cao, F. Wu and C. Zhou, *ACS nano*, 2014, **8**, 12769-12776.
181. P. He, J. Cao, H. Ding, C. Liu, J. Neilson, Z. Li, I. A. Kinloch and B. Derby, *ACS*

- applied materials & interfaces*, 2019, **11**, 32225-32234.
182. M. H. Overgaard, M. Kühnel, R. Hvidsten, S. V. Petersen, T. Vosch, K. Nørgaard and B. W. Laursen, *Advanced Materials Technologies*, 2017, **2**, 1700011.
  183. S. Xu, Y. Dall'Agnese, G. Wei, C. Zhang, Y. Gogotsi and W. Han, *Nano energy*, 2018, **50**, 479-488.
  184. W. Li, S. Yang and A. Shamim, *npj Flexible Electronics*, 2019, **3**, 13.
  185. Q. Zhang, F. Zhang, S. P. Medarametla, H. Li, C. Zhou and D. Lin, *Small*, 2016, **12**, 1702-1708.
  186. J. M. Gardner, G. Sauti, J.-W. Kim, R. J. Cano, R. A. Wincheski, C. J. Stelter, B. W. Grimsley, D. C. Working and E. J. Siochi, *Additive Manufacturing*, 2016, **12**, 38-44.
  187. C. Ladd, J. H. So, J. Muth and M. D. Dickey, *Advanced Materials*, 2013, **25**, 5081-5085.
  188. J. Li, J. Cao, B. Lu and G. Gu, *Nature Reviews Materials*, 2023, **8**, 604-622.
  189. W. Yang, J. Yang, J. J. Byun, F. P. Moissinac, J. Xu, S. J. Haigh, M. Domingos, M. A. Bissett, R. A. Dryfe and S. Barg, *Advanced materials*, 2019, **31**, 1902725.
  190. J. Liu, W. Li, Y. Guo, H. Zhang and Z. Zhang, *Composites Part A: Applied Science and Manufacturing*, 2019, **120**, 140-146.
  191. Z. Kennedy, J. Christ, K. Evans, B. Arey, L. Sweet, M. Warner, R. Erikson and C. Barrett, *Nanoscale*, 2017, **9**, 5458-5466.
  192. A. Cataldi, D. Rigotti, V. Nguyen and A. Pegoretti, *Materials Today Communications*, 2018, **15**, 236-244.
  193. S. R. Bates, I. R. Farrow and R. S. Trask, *Materials & Design*, 2019, **162**, 130-142.
  194. X. Mu, J. K. Sahoo, P. Cebe and D. L. Kaplan, *Polymers*, 2020, **12**, 2936.
  195. Y. Chen, Z. Yu, Y. Ye, Y. Zhang, G. Li and F. Jiang, *ACS nano*, 2021, **15**, 1869-1879.
  196. J. Wang, Y. Liu, Z. Fan, W. Wang, B. Wang and Z. Guo, *Advanced composites and hybrid materials*, 2019, **2**, 1-33.
  197. N. Lopez-Larrea, M. Criado-Gonzalez, A. Dominguez-Alfaro, N. Alegret, I. d. Agua, B. Marchiori and D. Mecerreyes, *ACS Applied Polymer Materials*, 2022, **4**, 6749-6759.
  198. Z. Qi, J. Ye, W. Chen, J. Biener, E. B. Duoss, C. M. Spadaccini, M. A. Worsley and C. Zhu, *Advanced Materials Technologies*, 2018, **3**, 1800053.
  199. Y. Liu, K. Xian, R. Gui, K. Zhou, J. Liu, M. Gao, W. Zhao, X. Jiao, Y. Deng and H. Yin, *Macromolecules*, 2021, **55**, 133-145.
  200. C. K. Chua and M. Pumera, *Chemical Society Reviews*, 2014, **43**, 291-312.
  201. H. Fu, X. Yang, X. Jiang and A. Yu, *Langmuir*, 2013, **29**, 7134-7142.
